# Supplementary material
Source: Springer Nature journal article supplement (http://www.springermedizin.de/resource/supplementary/12967_2012_1473_MOESM2_ESM.pdf/9574812)

a.

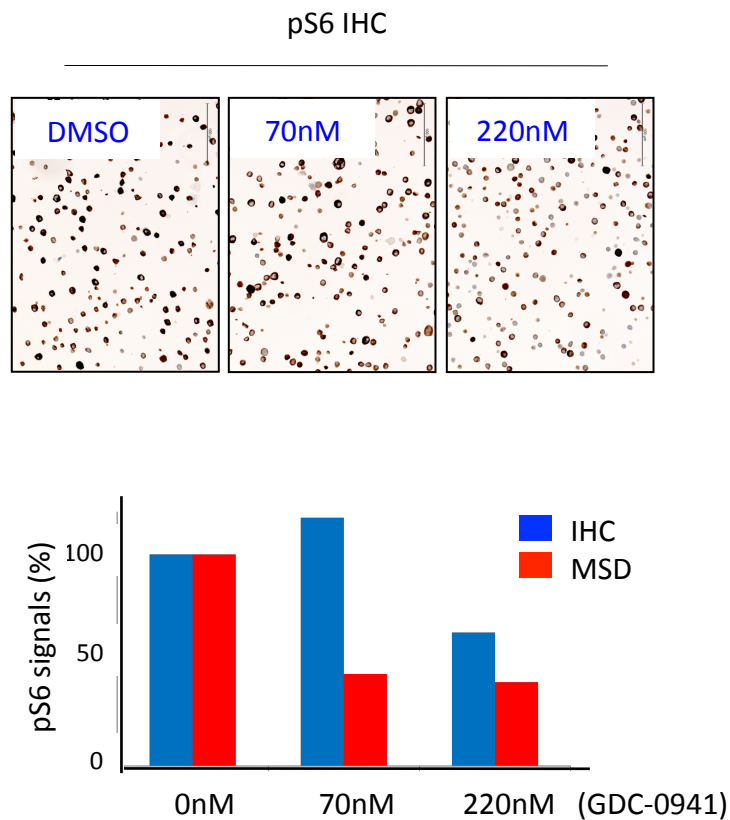

b.

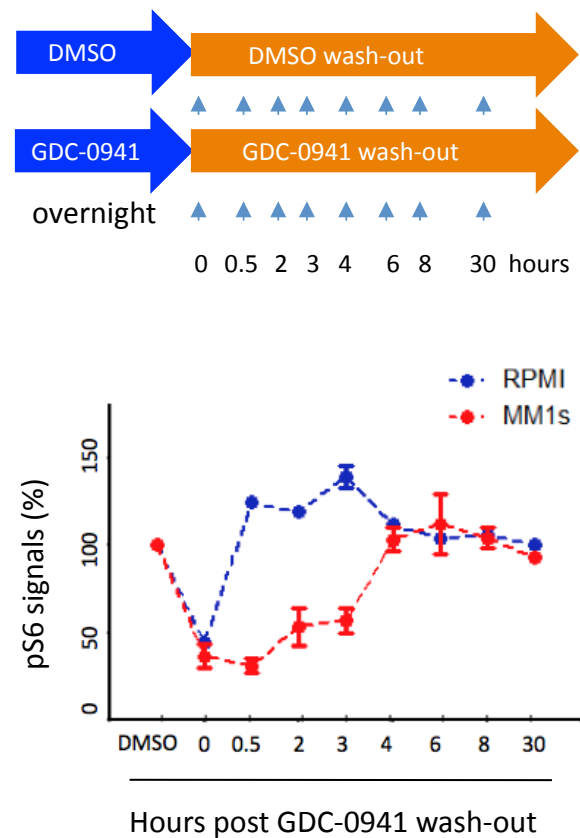

Supplement: MOESM2 [file 9574812]
